# Supplementary material for: Dek504 Encodes a Mitochondrion-Targeted E+-Type Pentatricopeptide Repeat Protein Essential for RNA Editing and Seed Development in Maize
Source: MDPI journal article supplement (doi:10.3390/ijms23052513), 2022-02-24
Supplement: s1 [file s1]

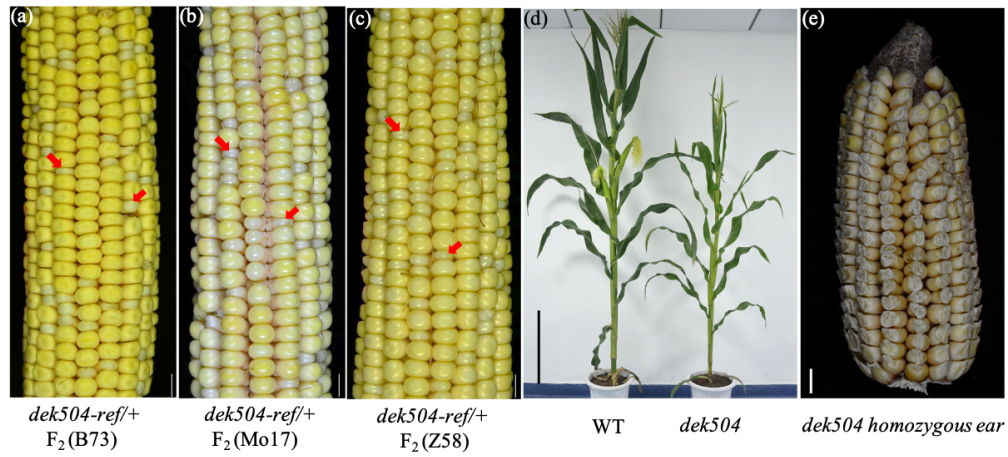

**Figure S1.** The phenotype of *dek504* in different hybridization backgrounds and phenotypes of *dek504* alleles. (a–c) A selfed ear segregates 3:1 for the wild-type (WT) and *dek504* mutant kernels (arrows). (a–c) belong to B73, Mo17 and Z58 backgrounds respectively. (d) The phenotype in the reproductive stages of *dek504* and WT ('B73') plants in the field respectively. (e) A homozygous ear of *dek504*. (a–e) Scale bar = 1 cm. (d) Scale bar = 0.5 m.

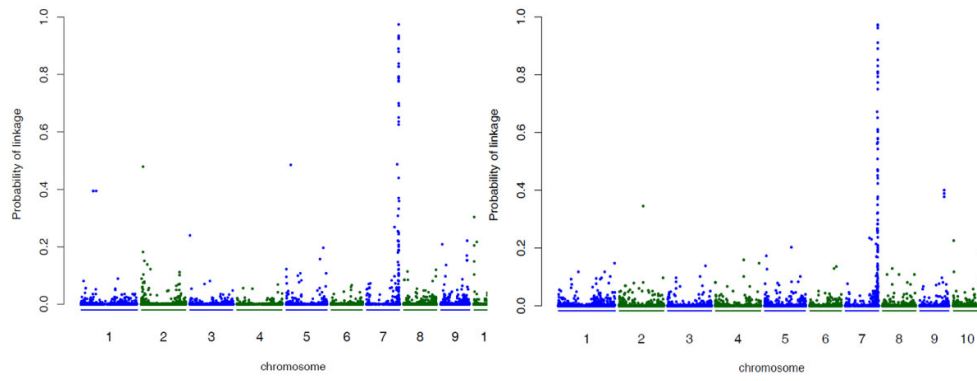

***dek504* : 16 DAP**

***dek504* : 17 DAP**

**Figure S2.** BSR-seq mapping of *dek504*. Mapping of *dek504* gene was performed using RNA sequencing of plant pools of wild type (WT) and *dek504-ref* kernels (pericycle removed) collected from the same ear. The probability of linkage of each SNP (Single Nucleotide Polymorphism) with the causal gene was determined by a Bayesian approach and plotted versus genomic coordinate of the SNP.

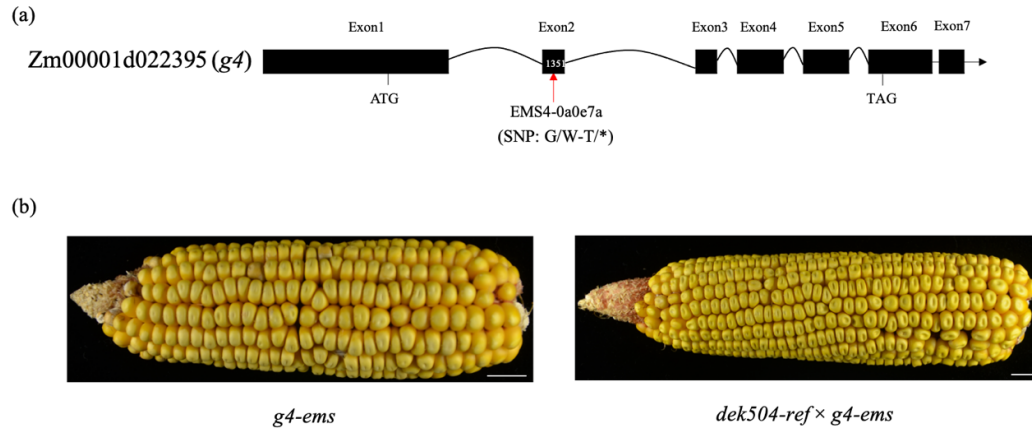

**Figure S3.** Allelic tests between *dek504-ref* heterozygotes and *g4-ems* homozygous mutants.

(a) Structure and mutation site of the *Zm00001d022395* gene. The red arrow denotes the mutation site of *Zm00001d022395*. Lines represent introns and black boxes represent exons. (b) Crossed ear between *dek504-ref* heterozygotes and *g4-ems* homozygous display WT phenotype. Bar, 1cm.

WT:

```
ATGCAATCCGCGCCTCCACCAATACCACCGCCTTGGCCGCGCGCGCTCTCTACGCT
CCTGTGCGCGTGGCGTTCCCTCGCCTCCGTCAAGCAGCTCCATGCCACATCCTCGCAC
GTTCAAAACAGCCCATTCCTTACAAATCATTTCCTCTCAAACTCCTCTCCTCTCTGCT
CCGCGCTTGCGCTCCGCGCAACTATGCCCTCCTCTCTCTCTCTCTCCACCCGCGCGCC
ACCGCCTTGACCTACAATGTACAATCCGCTTATTCGCTCATCGCGCCGGACACCTC
CCTTGCGCTCTCTCTCAGCATGCTCCGCGCGAGGTCCGCGTCCGACCCGACGCATAC
ACCTCCCTTTCTCTCTCTCGCGCGCGCGCTGCCCGCACCGCGCTCGCGCGGT
CCGCCCATGCTCTCTCGAGAAGATCGGTCTCGGTGACACGACACACCGTCCACTC
CCTCATCACCATGTACTCTGCTTGATGATCACTCGCGCGCGCGAGGTGTTGACG
GAATTTCCACCGGATGTCGTCTTGGAATCGATGGTGAAGGCATACGAACGGGC
AGGGATGGTGGCGAGGTGAAGGATGTTGCGCTCATGGTCACCGAGGGCGCAGT
GGCACCCAATGGGTGACTCTGGCGTGTGCTCACAGCTTGACGGGACGCTGGCAAT
TTGGTCTTGGGAGGTGGGTGGAGAGTGGTGAGGTCTGCGGGGATGGAGTGGAC
TCGCTCATTTGGTCAGCACTTGTGGGATGTATGAAAGTGTGGAGAGATGGCAGAGG
CACGGCGTGTGTTTATGGCATCAGACACAAGGATGTCGTGGCATGGAATGCCATGAT
CACCGGTATGCGCAAAATGGCATGTCAATGAAGCATAGCCTTGTTCACAGCATG
AGGGAAGTGGCGTGTGTCGGGACAAGATAACCTTGGTCGGTGTCTCTCATCTCGG
CAGCAGTTGGTGACTGAAGCTTGGAGTTGAATGGATACGTATGCCATGCGCAGAGG
CCTCTACAAACAATGTCTATGTAGGAACAGCCTTAGTGGACATGTATGCTAAGTGTGGAG
ATCTTGAAAGCAAGCAGCATGTTTTTGGGAAGATGCCATTCAAAATGAAGCCTCATG
GAATGCATTAATCTGTGGACTTGCTTCAACGGTCGAGGCTATGATGCCAATCAGCAGT
TTGAACATATGAGAGATGAGAAAGGACTCCAAACAGATGATATCATTATAGGTGT
GCTTTGCGCTGTGTATCATGCTGGGCTACTCGAGTATGGCCGCGCAGTTGTTCAATCTC
TGACACCTGTTTTTAAGATCATCTCTAGAATTGAGCACTACTCTGCTATTGTTGATTGT
TGGCAGCTGTGGTCAATTAGAAGAAGCATGGGATTTATGAGGAAATGCTGGCAA
GGTAGATGCCGTATGTAGGCCTTGTGCTGTCTGCGGAAATGCAAGAACACT
GAGGTTGGTGAGAGGGTCATCAATAGGATTATGAAGCTGGAGCCATCAAACTCGTGA
ACTACGTGGTGTATCAAGATTTATGAACCTCAGATAAAATGAGTAATCTGCAAGG
ATGATAGGCTAATGAGGGAGAGGGGTGTCAACAAGACTCCAGGGTGCAGCTGGGTT
GAGGTAAATGGAAAAAGTTCTTGAATTCATGCAAGCACTGAACCAACAGCATGGTGGG
AAGATATGATCAACTCATGGCGTACTGGTAAATGAGATGAGACTAAAGGGATATGTT
CCAAACCTTGATCTGGTGTAG+
```

*dek504-ref*:

```
ATGCAATCCGCGCCTCCACCAATACCACCGCCTTGGCCGCGCGCGCTCTCTACGCT
CTACGCTCCTGTGCGGTGCGCTTCCCTCGCCTCCGTCAAGCAGCTCCATG
CCCACATCCTCGCACGTTCAAACAGCCCATTCCTTACAAATCATTCTCTCTC
CAAACCTCCTCTCCTCTCTCTGCTCCGCTCTGCTCCGCGCGCAACTATGCC
CTCTCTCTCTCTCTCTCCACCGCGCGCACCGCTTCACCTACAATGTCA
CAATCGCTTATTCGCTCATCCGCGCGGACACCTCCCTTGGCTCTTCTCT
CAGCATGCTCCGCGCGGAGGTCCGCTCGGACCGGACGACATACACCTCCC
TTCTCTCTCTCTCGCGCGCGCGCTGCCCGGACCGGCTCTCGCGGTC
CGCCATGCTCTCTCGAGAAGATCGGTCTGGTGACCAACACACCGT
```

[ ]TCGGCACCCGTTCCCGCATCAACCCCTCCCGCTTCGGCACCCGTTCC  
AAGACGGGTCTGGTGACGCGGCAACGTTCCAATTCGAGAGAAAAATG  
CTGACGCCGCCGACTACAAACAGGATGGTTACGCCCTCACAAAAAG  
AAGGATAG<sup>+</sup>

**Figure S4.** The ORF of *Zm00001d022394* in WT and *dek504-ref*. The ORF of *Zm00001d022394* produced in WT and *dek504-ref*. The red brackets represent the 6.9-kb deletion in *dek504-ref*. The predicted stop codon of *Zm00001d022394* is indicated in red in WT and *dek504-ref*.

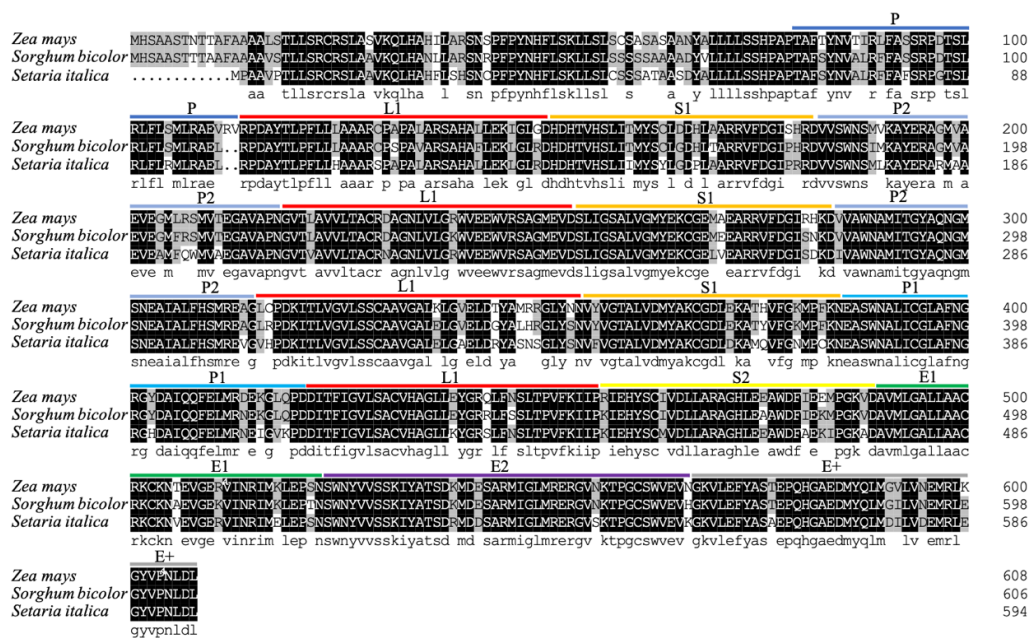

**Figure S5.** Sequence alignment of DEK504 and its homologues from *Sorghum bicolor* and *Setaria italica*. The amino acid sequence of DEK504 homologs, including the *Sorghum bicolor* (XP 021308964.1) and *Setaria italica* (XP 014661047.1), was downloaded from NCBI (<https://www.ncbi.nlm.nih.gov/>) and was aligned with DNAMAN.

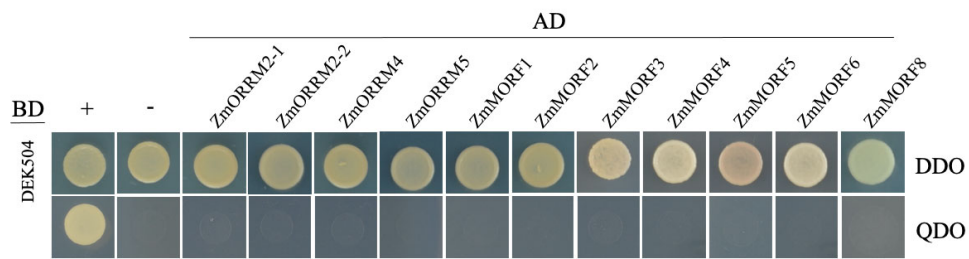

**Figure S6.** A yeast two hybrid (Y2H) assay between DEK504 with organelle RRM proteins (ORRMs) and multiple organelle RNA editing factors/RNA-editing factor interacting proteins (MORFs/RIPs). The colony pictures were taken after three days incubation at 30 °C in SD/- Trp-Leu dropout (DDO) plates, as well as three days incubation at 30 °C in SD/-Trp-Leu-His-Ade dropout (QDO) plates.

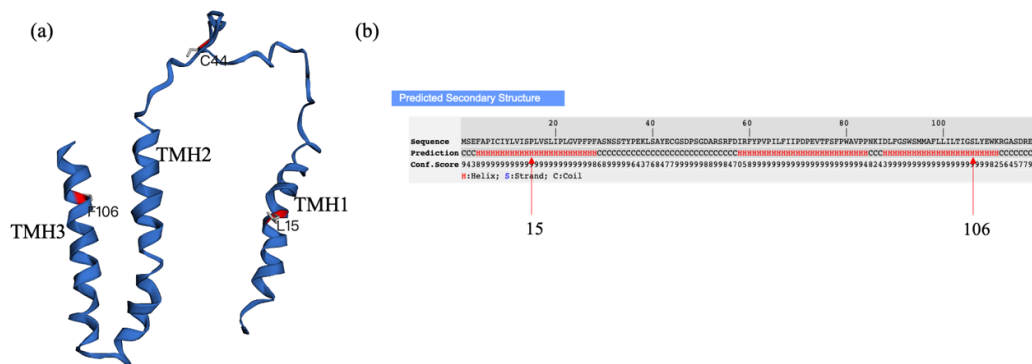

**Figure S7.** Predicted protein structure of NAD3 in the WT. **(a)** The 3D structure was analyzed according to its homology with c6humC\_. The L15 and F106 has already been edited, C44 is the important amino acid to access for chemical modification in only the D-form. **(b)** the predicted secondary structure was analyzed by I-TASSER. The amino acids need to be edited is numbered.
